# Supplementary material for: Rapid measurement of Watson-Crick to Hoogsteen exchange in unlabeled DNA duplexes using high-power SELOPE imino 1 H CEST
Source: Copernicus journal article supplement (doi:10.5194/mr-2021-58), 2021-07-20

# Selectively exciting only G10&G2

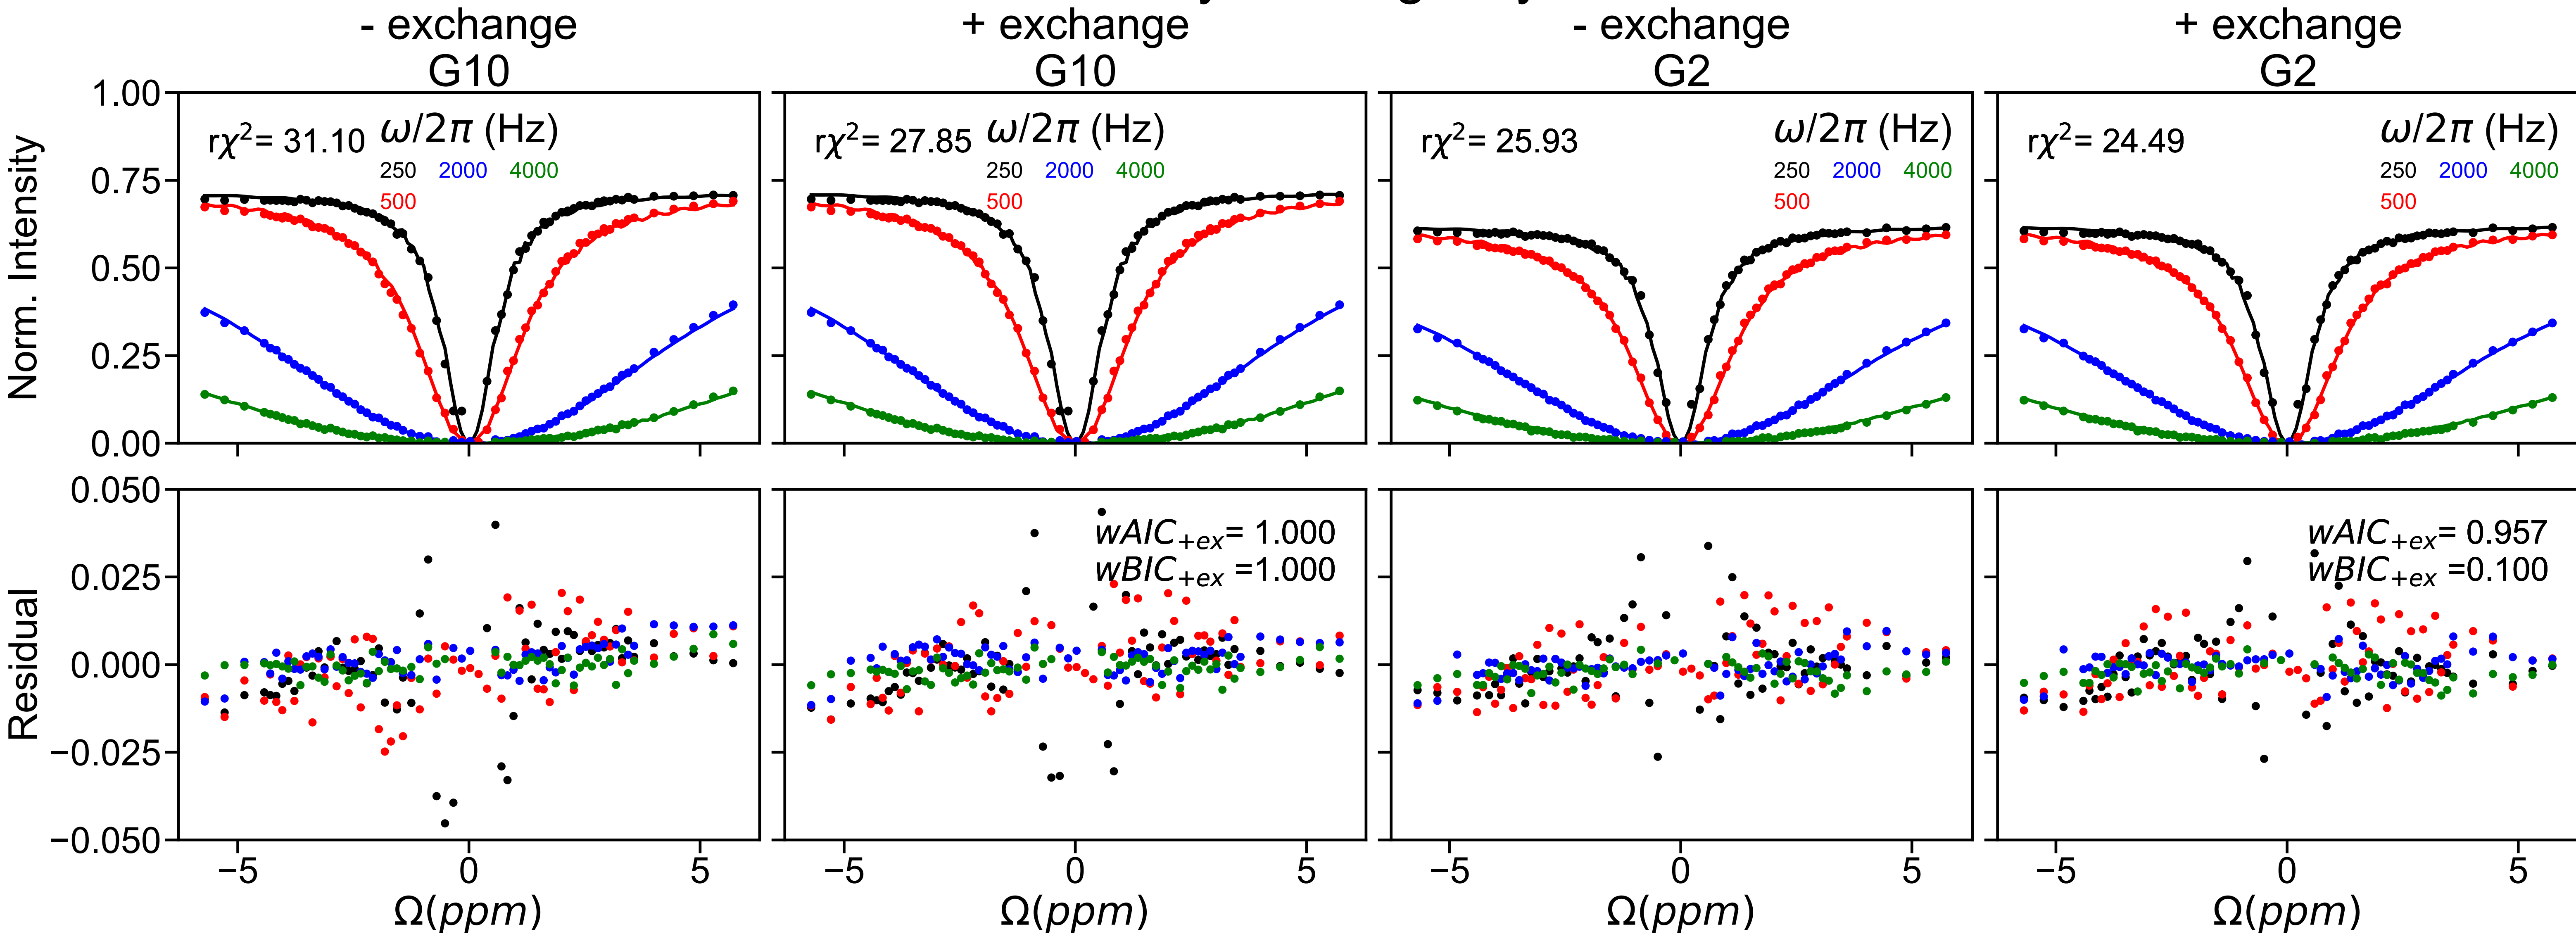

Supplement: Supplementary file [file mr-2021-58-AC4-supplement.zip]
