# Supplementary material for: Rapid measurement of Watson-Crick to Hoogsteen exchange in unlabeled DNA duplexes using high-power SELOPE imino 1 H CEST
Source: Copernicus journal article supplement (doi:10.5194/mr-2021-58), 2021-07-20

A<sub>6</sub>-DNA 25°C T7-H3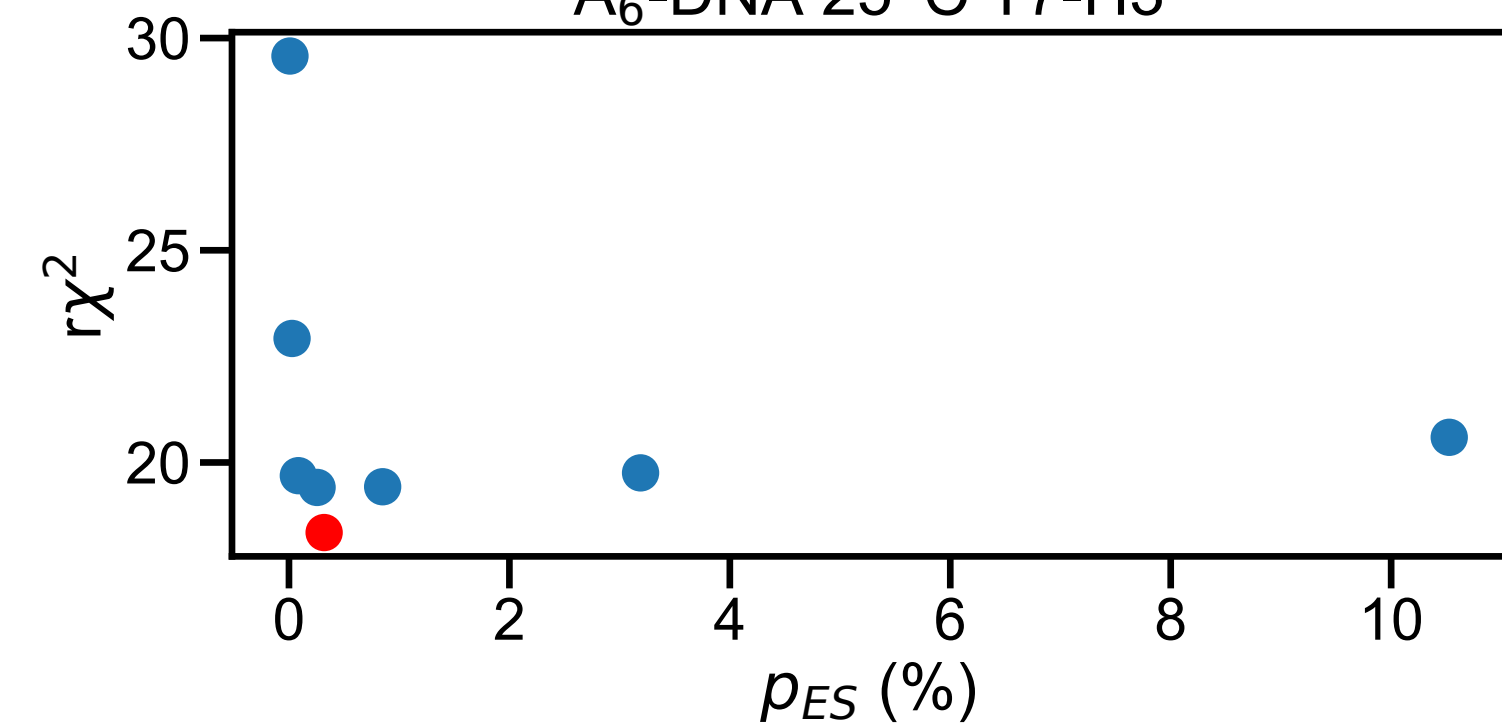A<sub>6</sub>-DNA 25°C T9-H3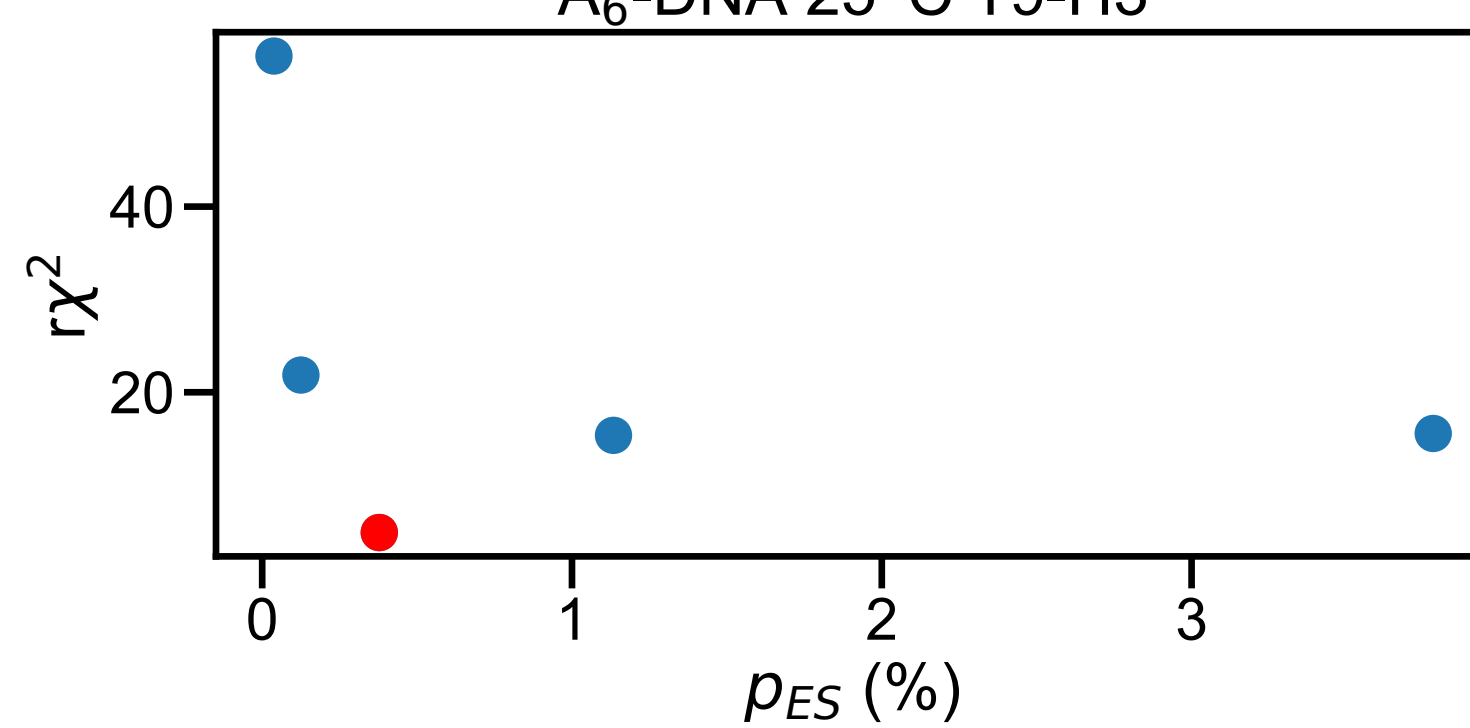A<sub>6</sub>-DNA 25°C T22-H3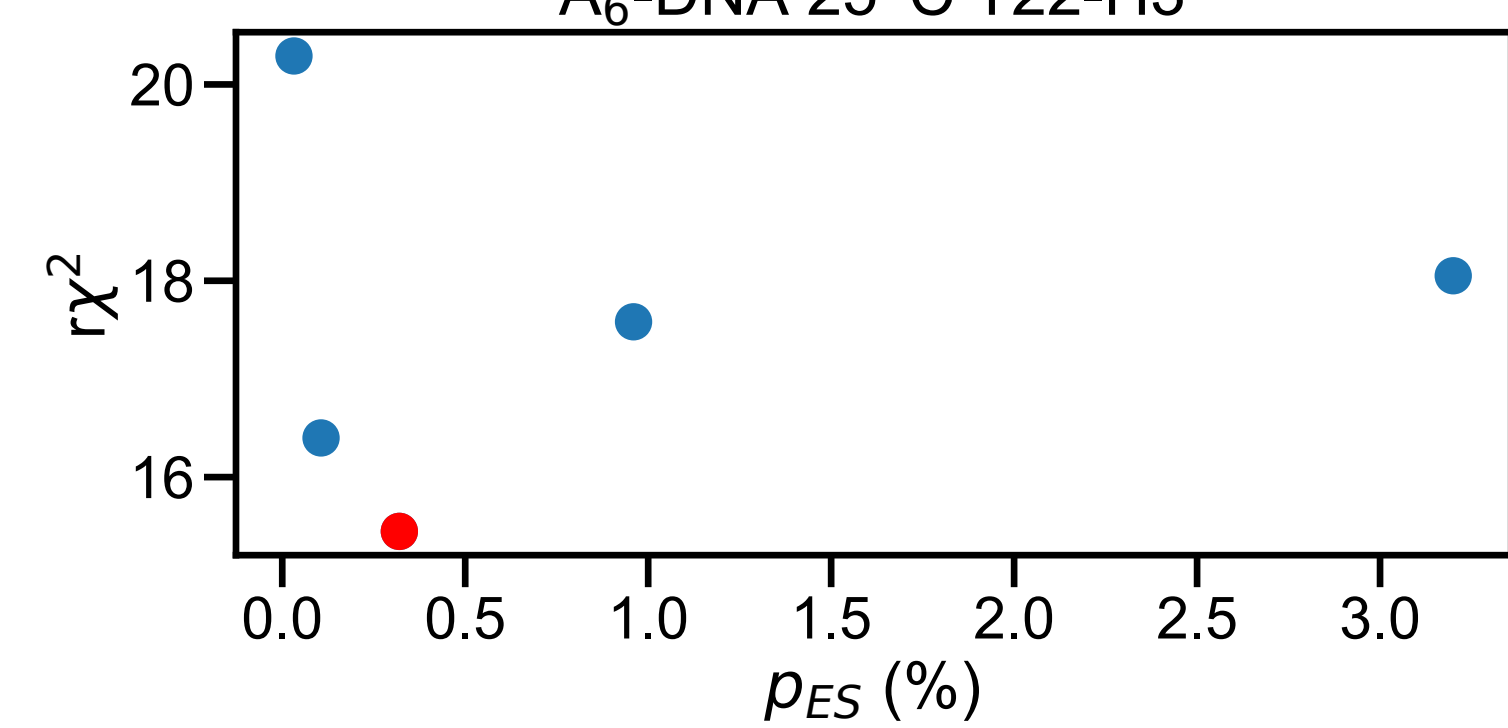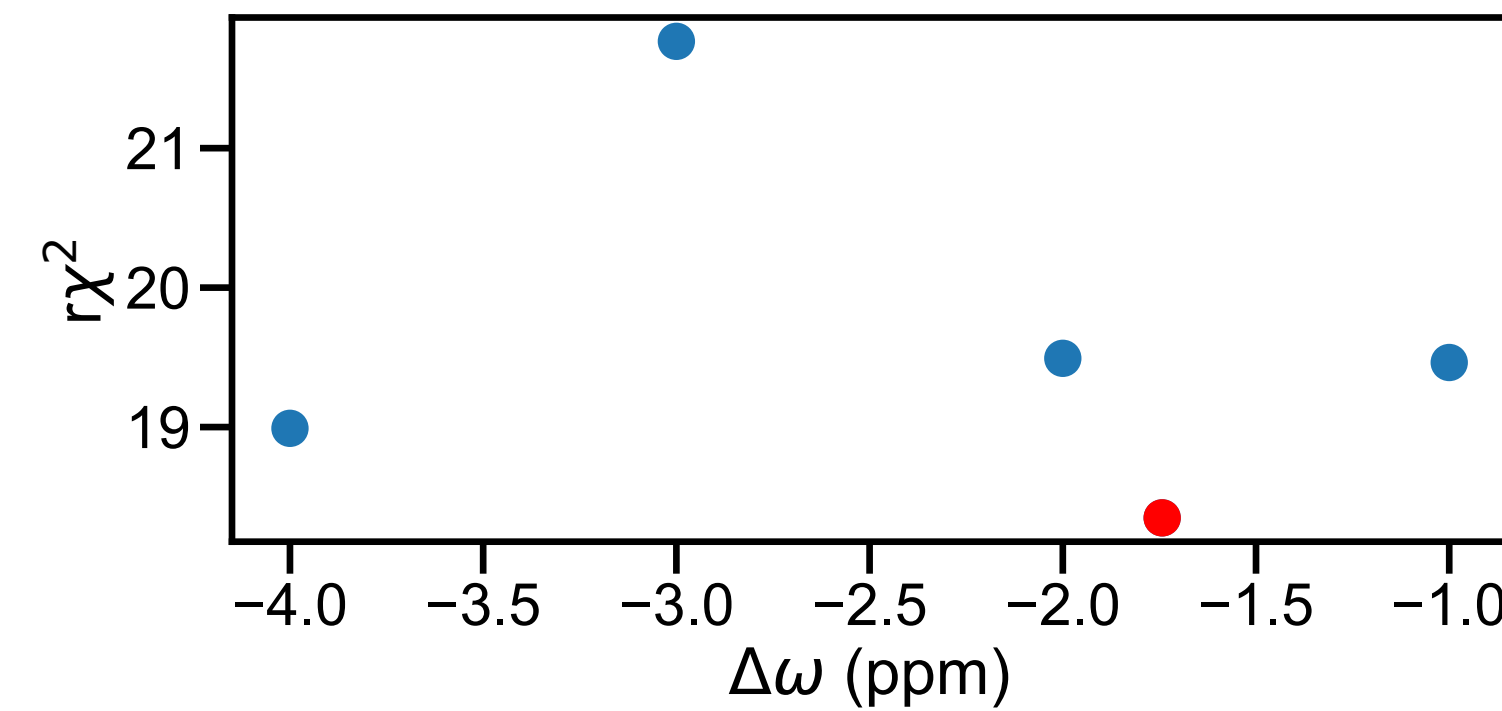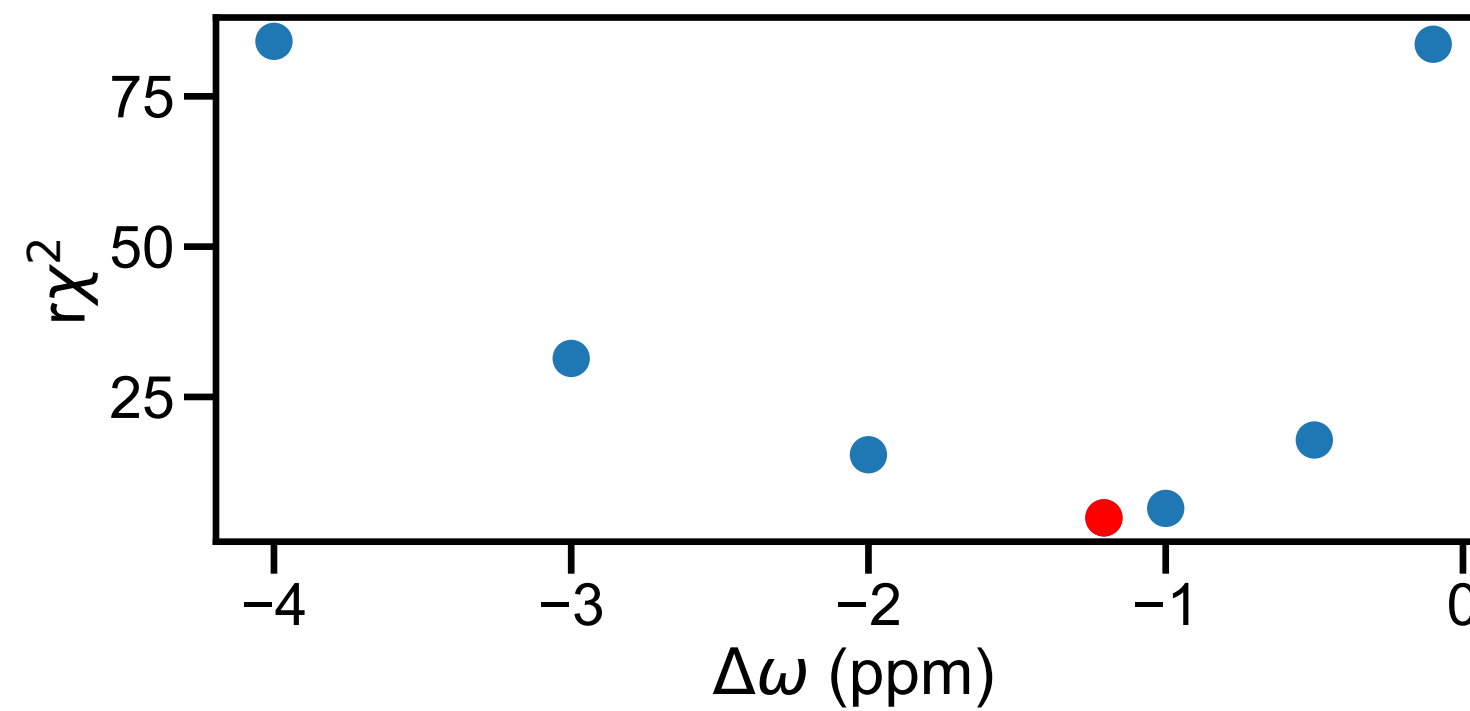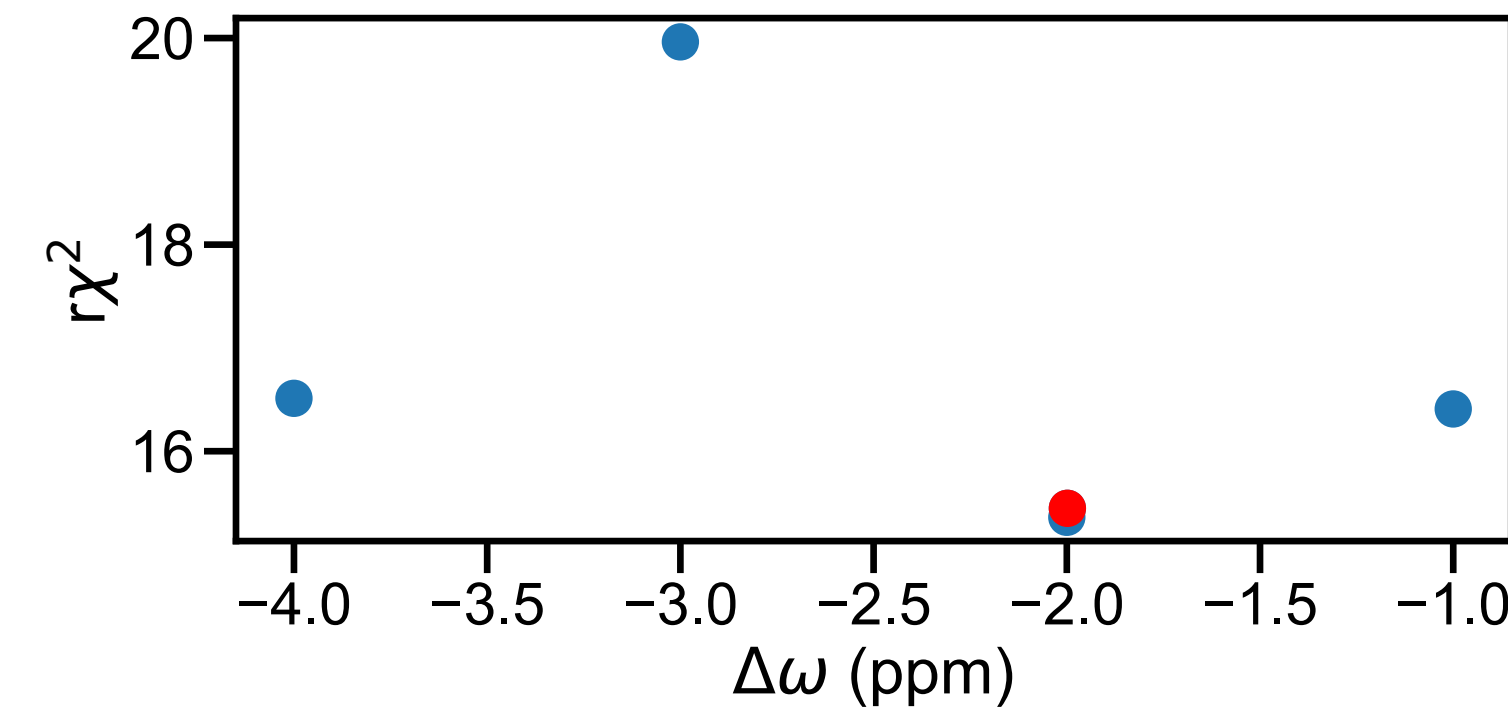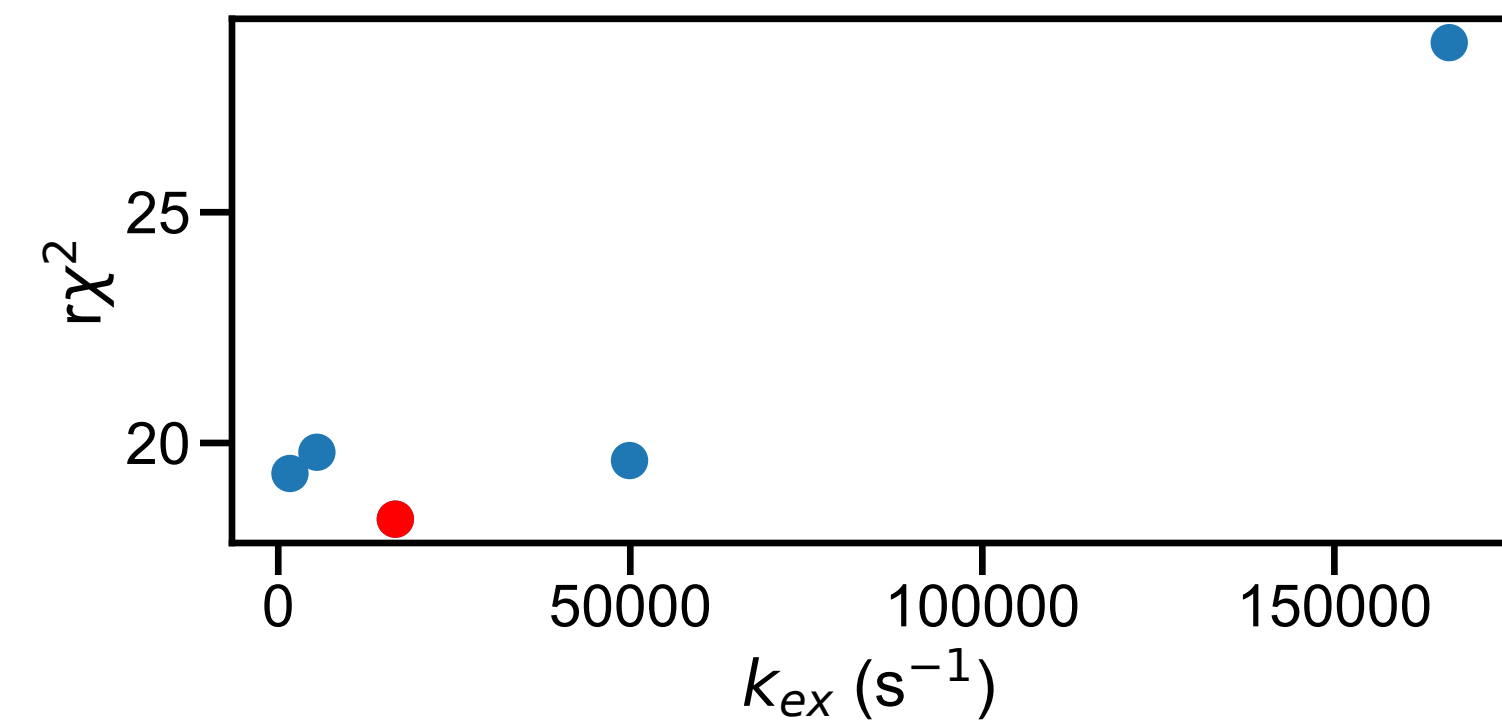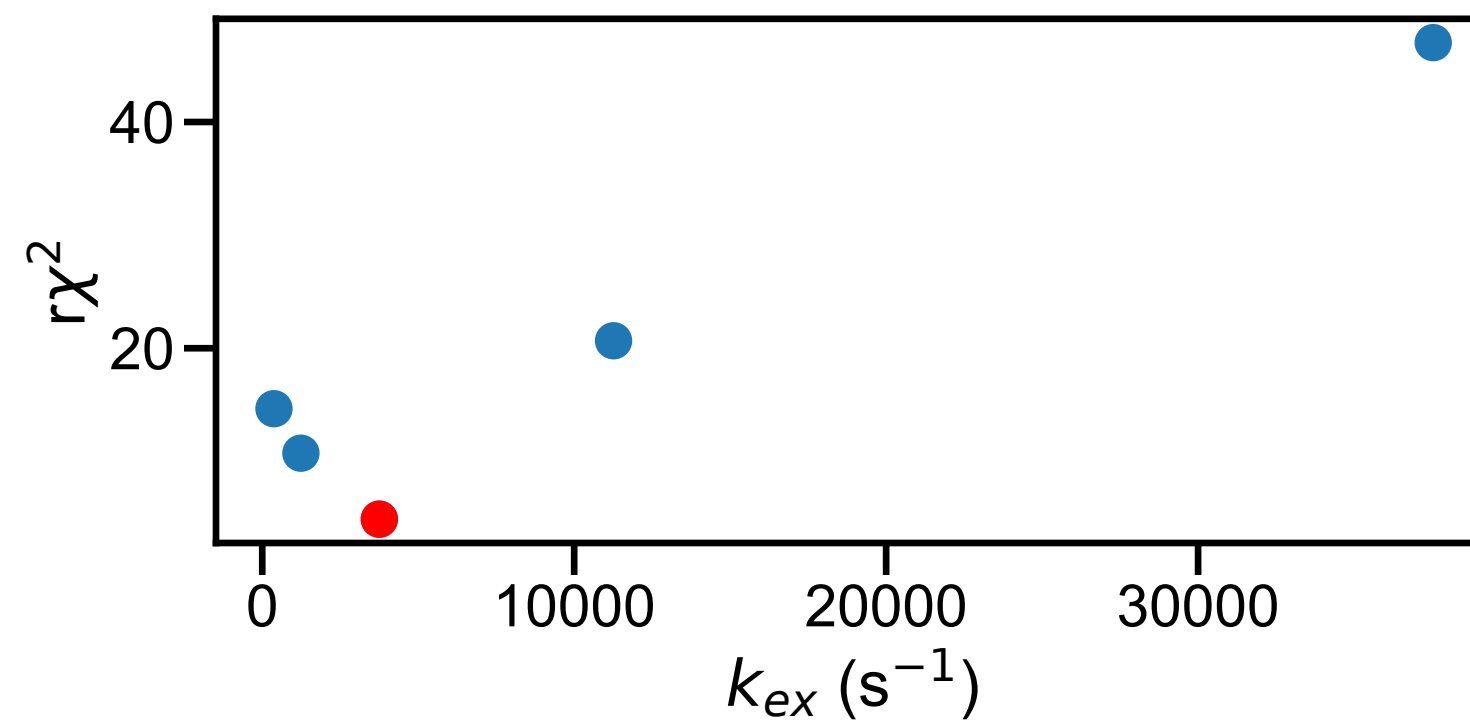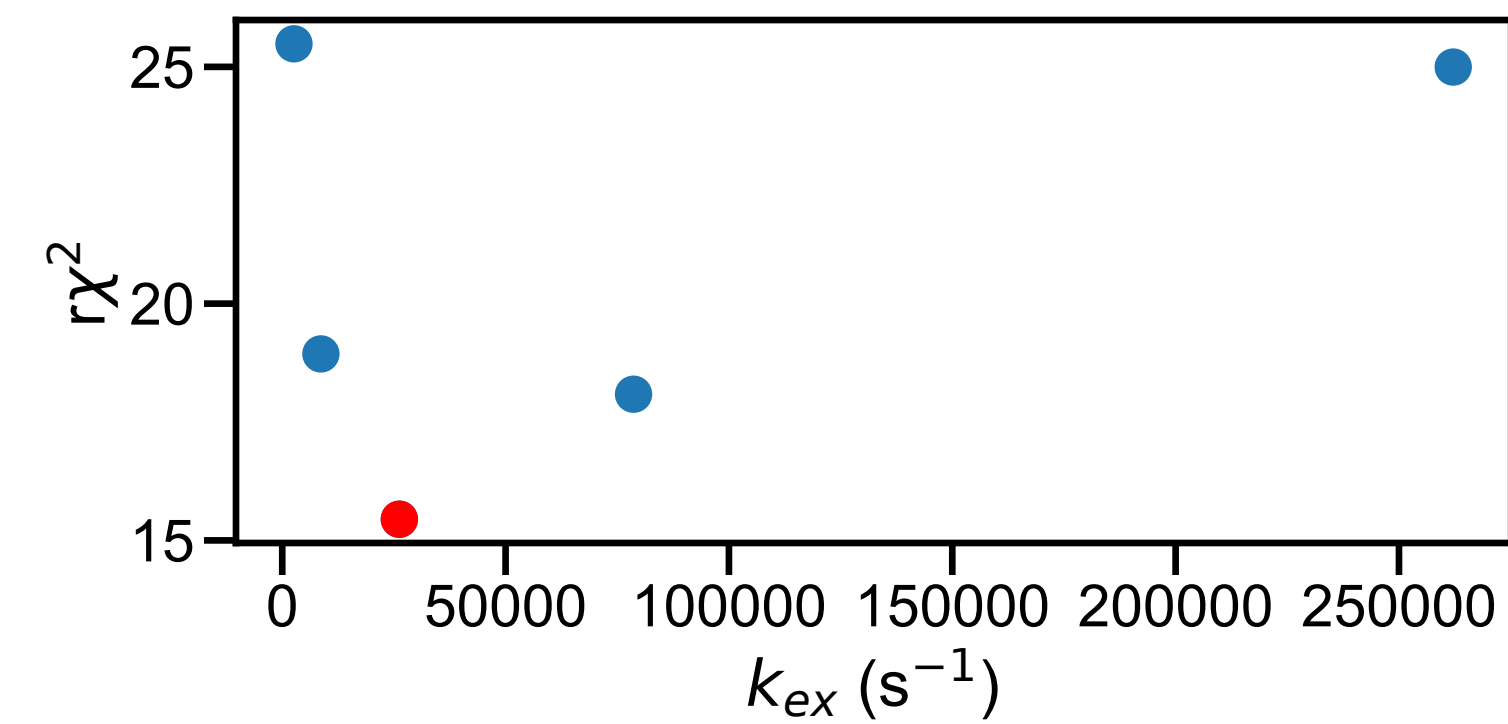

Supplement: Supplementary file [file mr-2021-58-AC4-supplement.zip]
